# Supplementary material
Source: PubMed Central journal article supplement (PMC5326583)
Supplement: NIHMS838994-supplement-401_2016_1661_MOESM1_ESM.pdf [file NIHMS838994-supplement-401_2016_1661_MOESM1_ESM.pdf]

## **Brain-to-stomach transfer of $\alpha$ -synuclein *via* vagal preganglionic projections**

**Ayse Ulusoy,<sup>1</sup> Robert J. Phillips,<sup>2</sup> Michael Helwig,<sup>1</sup> Michael Klinkenberg,<sup>1</sup> Terry L. Powley<sup>2</sup> and Donato A. Di Monte<sup>1</sup>**

<sup>1</sup>German Center for Neurodegenerative Diseases (DZNE), Sigmund-Freud-Strasse 27, 53127 Bonn, Germany

<sup>2</sup>Department of Psychological Sciences, Purdue University, 703 Third Street, West Lafayette, IN 47907-2081, USA

Correspondence to: Donato A. Di Monte, German Center for Neurodegenerative Diseases (DZNE), Sigmund-Freud-Strasse 27, 53127 Bonn, Germany

E-mail: [donato.dimonte@dzne.de](mailto:donato.dimonte@dzne.de)

Phone: +49 228 43302650

Fax: +49 228 43302689

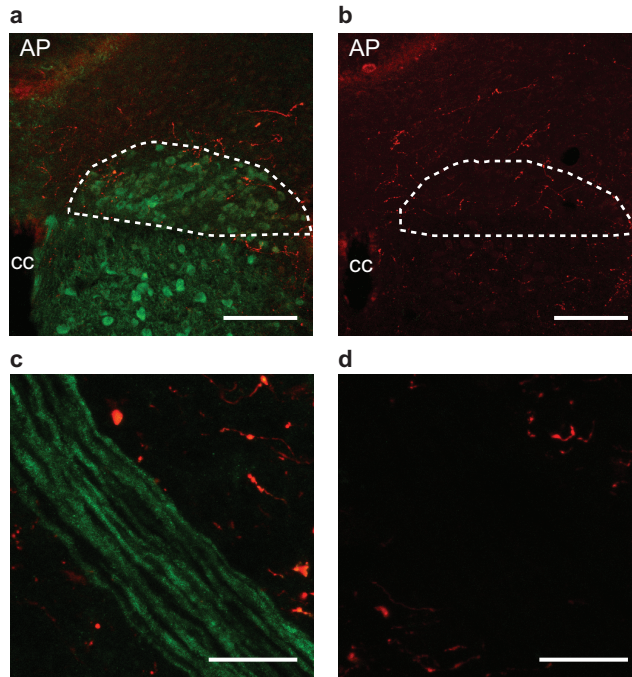

**Supplementary Fig. 1** Rats ( $n = 3$ ) received a single midbrain injection of h $\alpha$ -synuclein-AAVs and were killed at 6 months post-treatment. **a, b** Consecutive sections of the medulla oblongata containing the DMnX were double-stained with anti-h $\alpha$ -synuclein (red) and anti-ChAT (green) (**a**) or incubated with anti-h $\alpha$ -synuclein in the absence of ChAT primary antibody (**b**). The right DMnX is delineated by dashed lines, and the area postrema (AP) and central canal (cc) are indicated. Scale bars = 200  $\mu$ m. **c, d** Consecutive sections of the medulla oblongata at the level where intramedullary fibers of the right vagus nerve are formed were double-stained with anti-h $\alpha$ -synuclein and anti-ChAT (**c**) or incubated with anti-h $\alpha$ -synuclein in the absence of ChAT primary antibody (**d**). Scale bars = 10  $\mu$ m. Lack of labeling in (**b**) and (**d**) confirms specificity of the ChAT labeling.

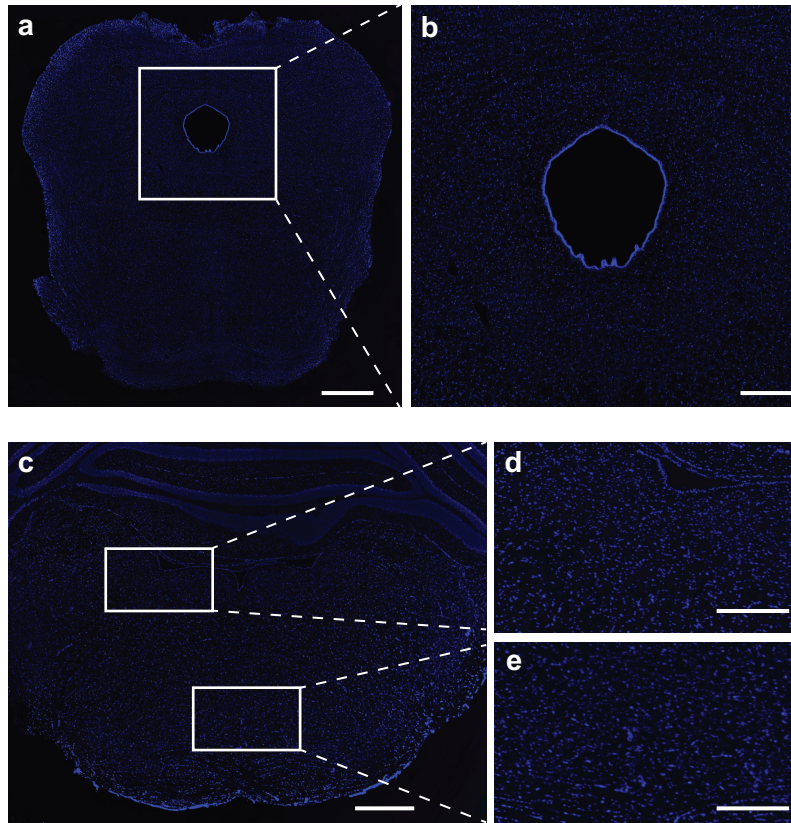

**Supplementary Fig. 2** Rats ( $n = 3$ ) received a single midbrain injection of  $\alpha$ -synuclein-AAVs and were killed at 2 months post-treatment. **a-e** Sections from the lower midbrain (representative images in **a** and **b**) and from the pons (representative images in **c-e**) were processed for fluorescent *in situ* hybridization to detect WPRE mRNA (white). Sections were also counterstained with DAPI (blue). The square box in (**a**) encompasses the periaqueductal gray shown at higher magnification in (**b**). The rectangular boxes in (**c**) encompass the right locus coeruleus / parabrachial nucleus and the pontine reticular nucleus that are shown at higher magnification in (**d**) and (**e**), respectively. No white signal (i.e. no WPRE hybridization) was detected in any of the sections from these brain regions. Scale bars = 1 mm in (**a** and **c**) and 500  $\mu$ m in (**b**, **d** and **e**).

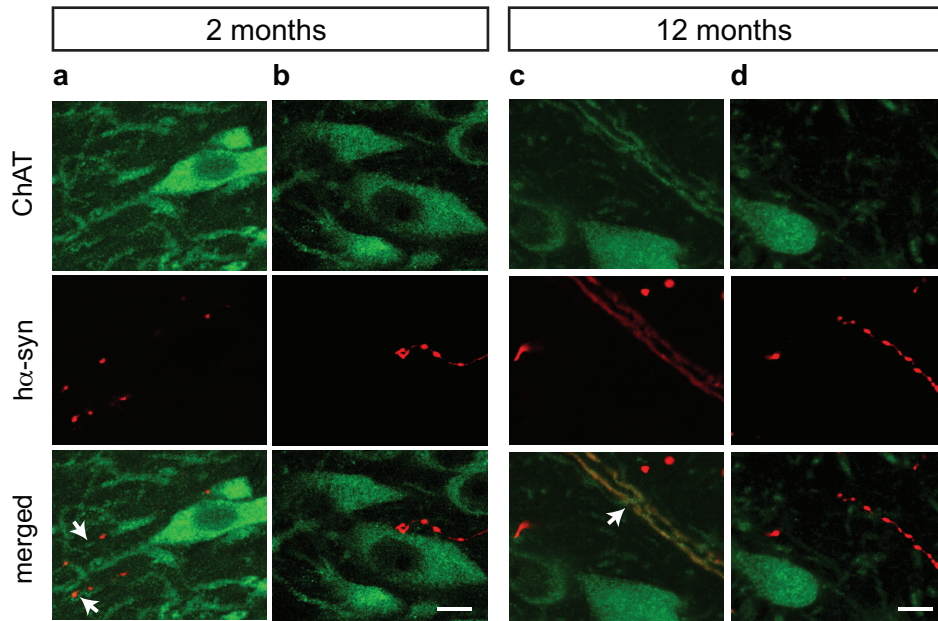

**Supplementary Fig. 3 a-d** Rats ( $n \geq 5$ /time point) received a single midbrain injection of h $\alpha$ -synuclein-AAVs and were killed at 2 and 12 months post-treatment. Sections of the medulla oblongata were double-stained with anti-ChAT and anti-h $\alpha$ -synuclein (h $\alpha$ -syn). Representative confocal images show DMnX axons co-labeled with h $\alpha$ -syn and ChAT (**a** and **c**; white arrows in the merged panels), or immunoreactive for h $\alpha$ -syn but not ChAT (**b** and **d**). Scale bars = 10  $\mu$ m.



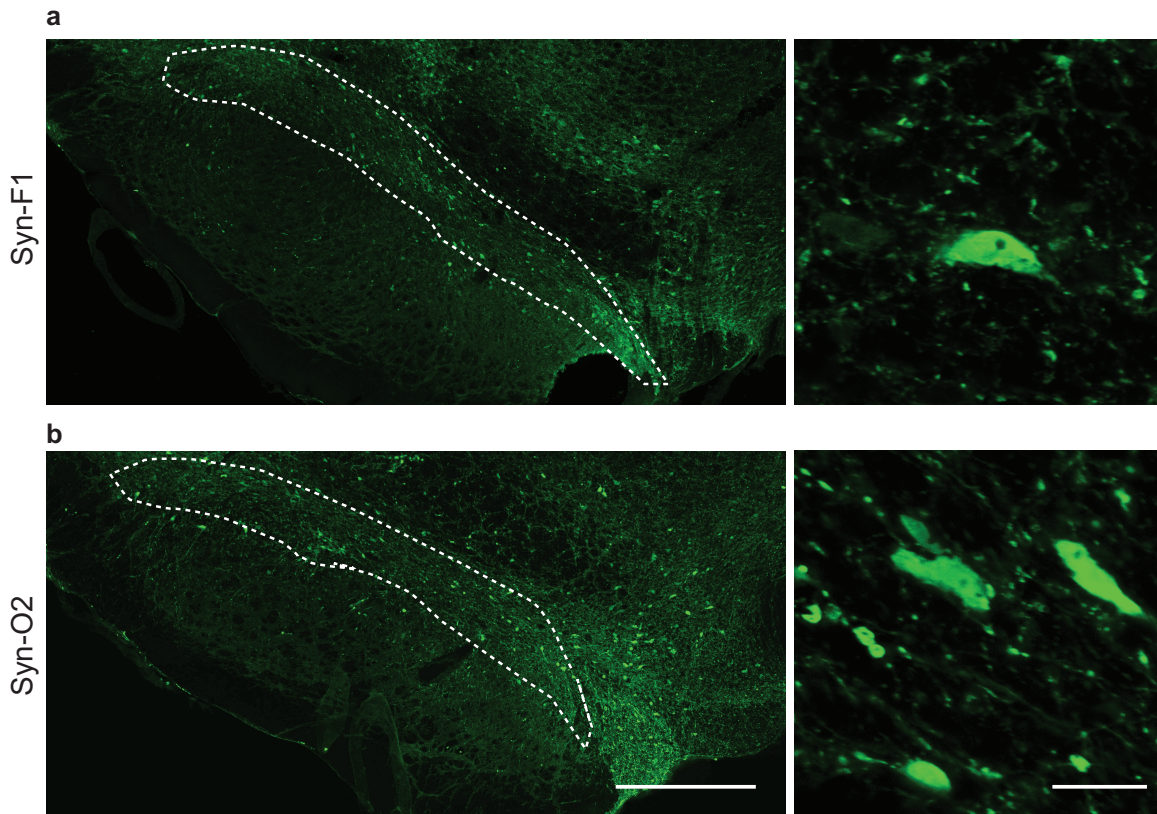

**Supplementary Fig. 4 a, b** Rats ( $n = 5$ ) were killed at 6 months after a single midbrain injection of h $\alpha$ -synuclein-AAVs. Sections of the midbrain containing the substantia nigra pars compacta (delineated by dashed lines in the left panels) were stained with an antibody (Syn-F1) that specifically recognizes mature  $\alpha$ -synuclein fibrils (**a**) or an antibody (Syn-O2) that recognizes oligomeric and fibrillar forms of  $\alpha$ -synuclein (**b**). Higher magnification images (right panels) show nigral cell bodies and neuronal projections containing aggregated  $\alpha$ -synuclein. Scale bars = 250  $\mu$ m (lower magnification) and 20  $\mu$ m (higher magnification).

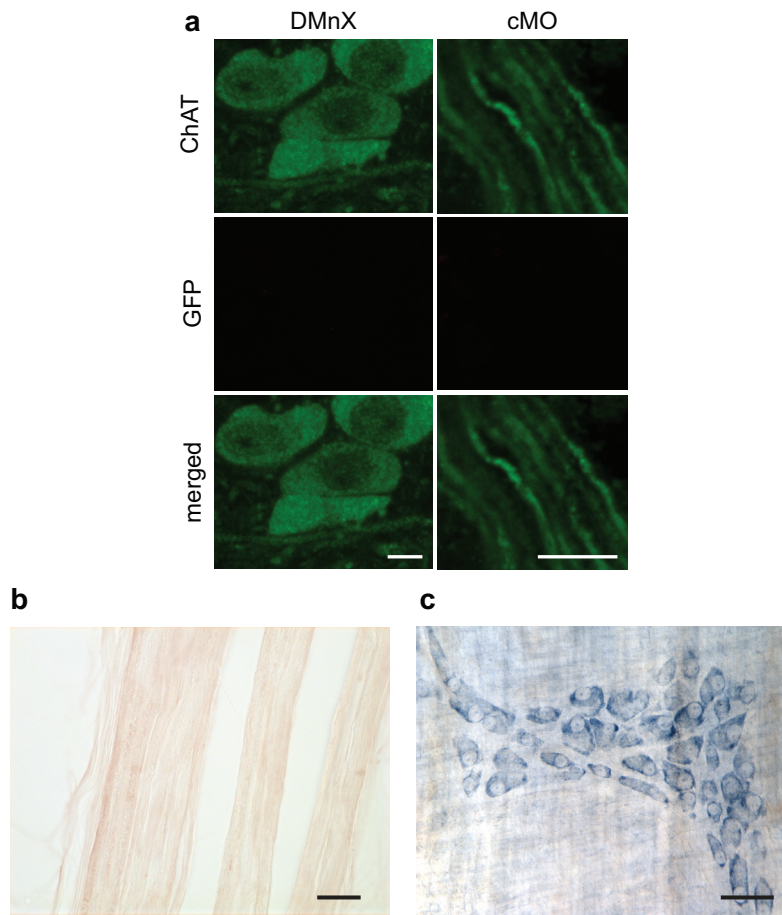

**Supplementary Fig. 5** Rats ( $n = 5$ ) received a single injection of GFP-AAVs in the right midbrain and were killed at 12 months. **a** Sections of the right medulla oblongata were double-stained with anti-ChAT (green) and anti-GFP (false-colored in red). ChAT-positive neurons and neuronal projections are shown in the DMnX (left panels); intramedullary fibers of the vagus nerve were also labeled for ChAT in caudal sections of the medulla oblongata (cMO; right panels). Please note the absence of GFP co-labeling. Scale bars = 10  $\mu\text{m}$ . **b** Longitudinal sections of right vagus nerves were stained with anti-GFP. The representative image shows no specific immunoreactivity. Scale bar = 10  $\mu\text{m}$ . **c** Stomach whole mounts were stained with anti-GFP and counterstained with Cuprolinic Blue. The representative image shows ganglionic cells of the myenteric plexus. No specific GFP immunoreactivity was detected. Scale bar = 50  $\mu\text{m}$ .
